# Supplementary material for: Characterization of a common wheat (Triticum aestivum L.) TaSnRK2.7 gene involved in abiotic stress responses
Source: PubMed Central journal article supplement — J Exp Bot. 2010 Oct 28;62(3):975–88. doi: 10.1093/jxb/erq328 (PMC3022395; doi:10.1093/jxb/erq328), 2010-10-28

**Characterization of a common wheat (*Triticum aestivum* L.)  
*TaSnRK2.7* gene involved in abiotic stress responses**

Hongying Zhang<sup>1, 2, §</sup> Xinguo Mao<sup>1, §</sup> Ruilian Jing<sup>1, \*</sup> Xiaoping Chang<sup>1</sup> and Huimin Xie<sup>2</sup>

1. The National Key Facility for Crop Gene Resources and Genetic Improvement,  
Institute of Crop Science, Chinese Academy of Agricultural Sciences, Beijing 100081,  
China

2. College of Agronomy, Northwest A & F University, Yangling 712100, Shaanxi,  
China

§ These authors contributed equally to this work

\* Corresponding author: Ruilian Jing

Tel/Fax: 86-10-82105829

Email: jingrl@caas.net.cn

## Supplementary materials

**Fig. S1** Identification of *TaSnRK2.7* transformed *Arabidopsis* plants. (A) Determination of green fluorescence in roots of transgenic *Arabidopsis* plants. Assays were performed at the seedling stage with a laser-scanning confocal microscope. Images were taken in dark field for green fluorescence, and the root outline and combination are in bright field. (B) RT-PCR analysis of transgenic plants. M: 200-bp ladder; Lanes 1-9, p35S-*TaSnRK2.7-GFP-NOS* transformed plants; Lane 10, wild-type *Arabidopsis* (negative control); Lane 11, p35S-*GFP-NOS* transformed plant (negative control); Lane 12, p35S-*TaSnRK2.7-GFP-NOS* plasmid DNA (positive control). (C) Expression levels of *TaSnRK2.7* in transgenic *Arabidopsis* lines L1-L6. The lowest expression of *TaSnRK2.7* in L4 was regarded as standard.

**Fig. S2** Morphological characterization of *TaSnRK2.7* plants. (A) Comparison of seed germination and seedlings between *TaSnRK2.7* transformants and controls grown on MS medium. (B) Phenotypes of mature transgenic lines and WT grown in soil (4 weeks). (C) Grain yields of *TaSnRK2.7* and WT plants. The seeds of transgenic *TaSnRK2.7* and WT plants cultured under well-watered conditions were harvested separately. The grain yield of each plant was measured after dehydration, and there were no significant differences. L1-L6, six individual *TaSnRK2.7* transgenic lines; WT, wild type; GFP, *GFP* transgenic line. Values are mean  $\pm$  SE, n=10.

Fig. S1

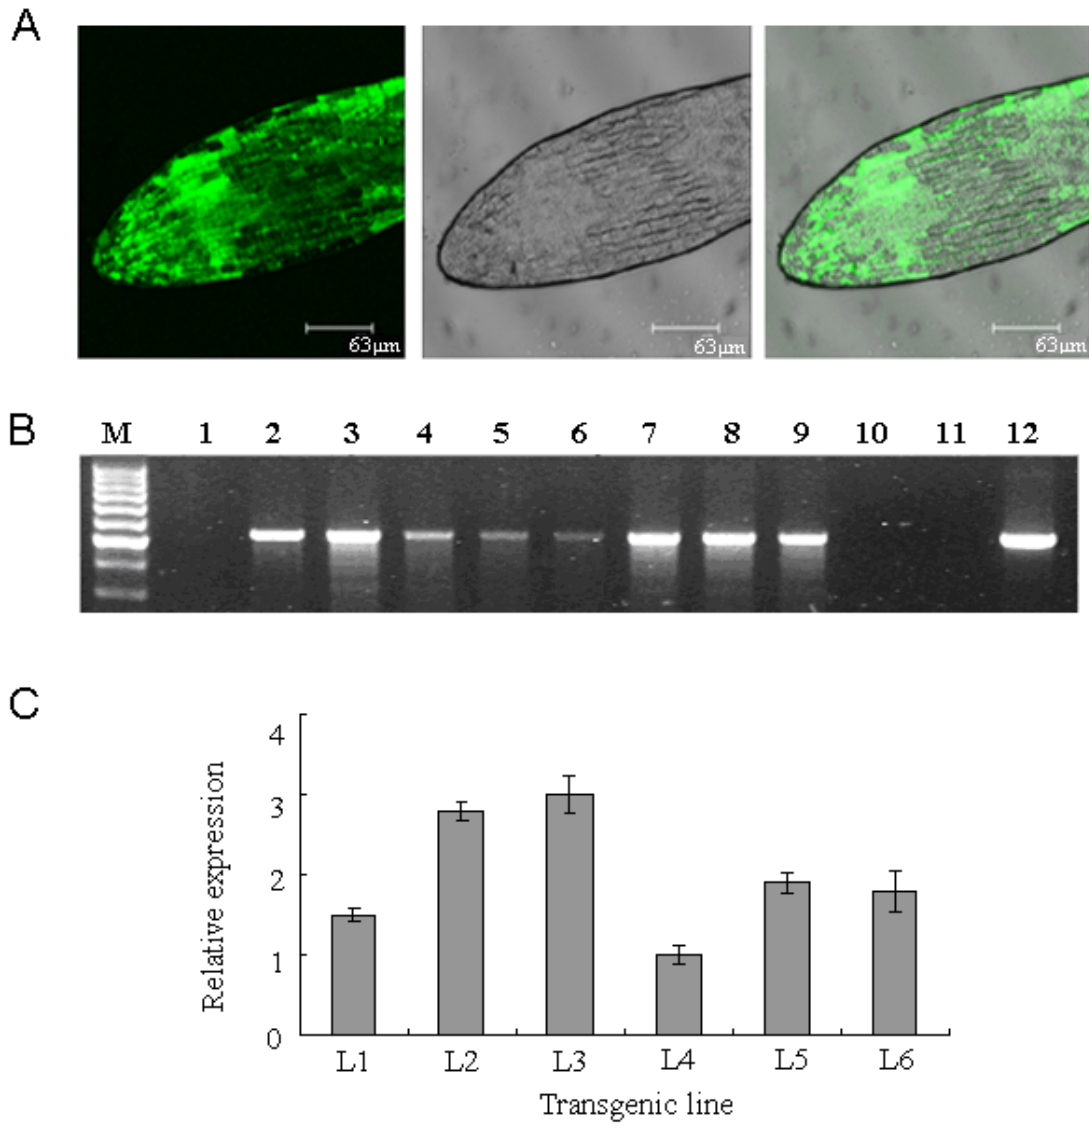

Fig. S2

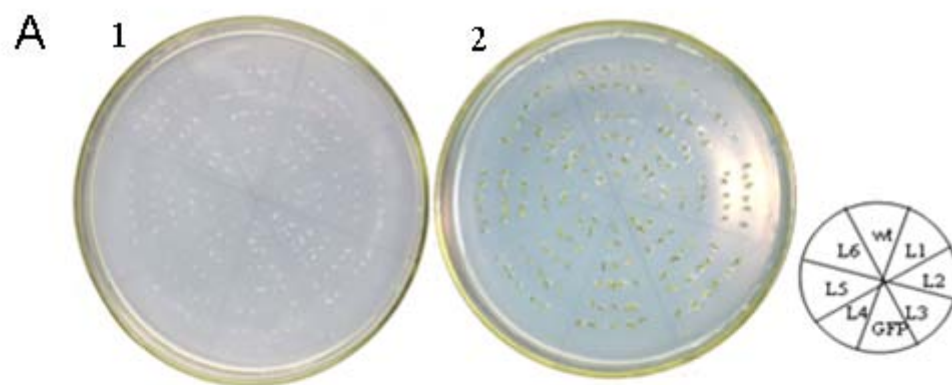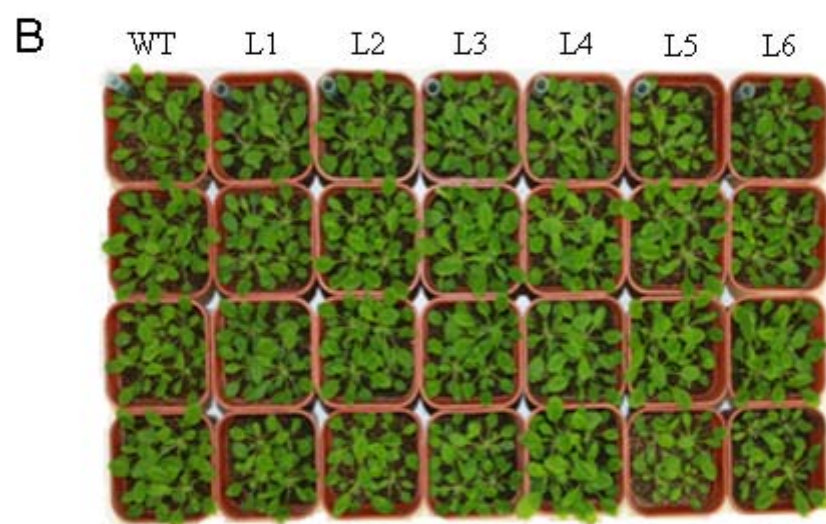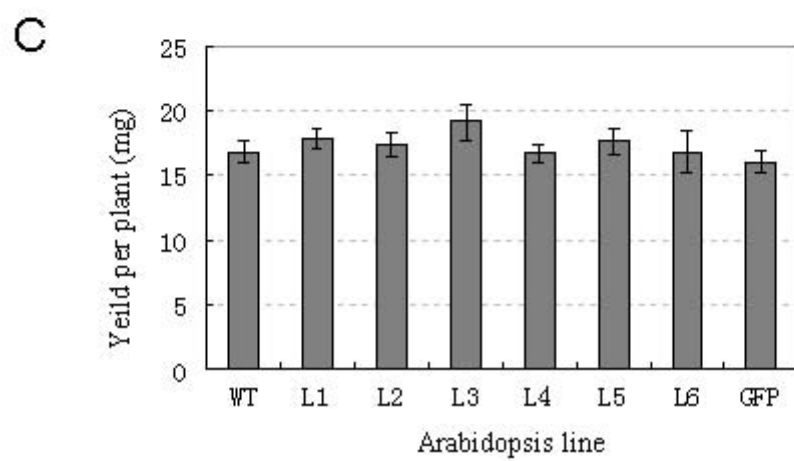

Supplement: supp_erq328_00051466-file001.pdf [file supp_erq328_00051466-file001.pdf]
